# Supplementary material for: Improvement of the capacitive performances for Co–Al layered double hydroxide by adding hexacyanoferrate into the electrolyte
Source: Royal Society of Chemistry journal article supplement (doi:10.1039/b814844a), 2009-01-01
Supplement: b814844a.pdf [file b814844a.pdf]

## Electronic Supplementary Information

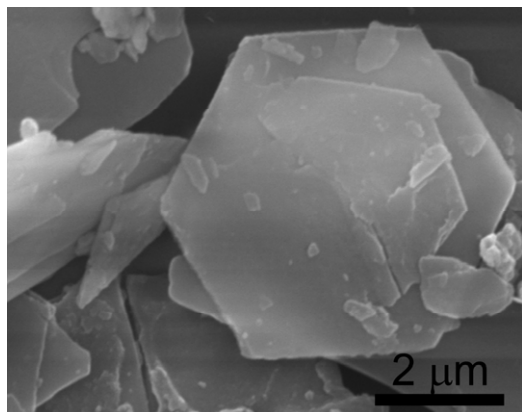

**Figure S1.** The SEM image of the as-prepared Co-Al LDH.

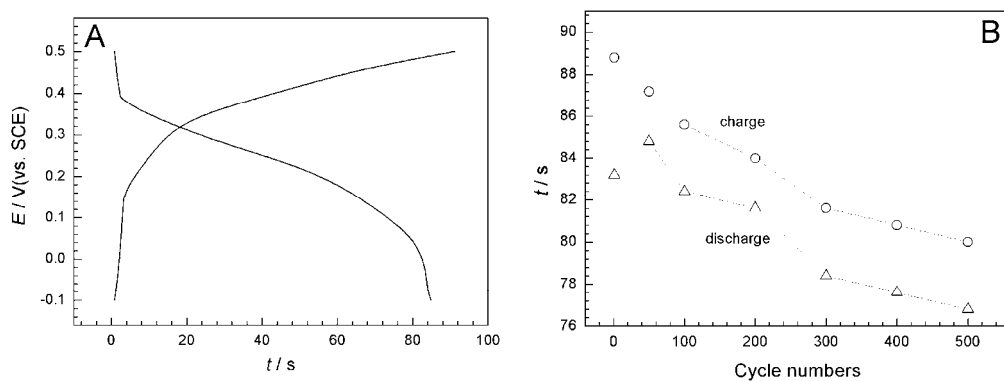

**Figure S2.** The charge/discharge curves (A) and long-term performance (B) of the Co-Al LDH at the constant current density of  $2 \text{ A g}^{-1}$  in the solution of  $1 \text{ M KOH} + 0.05 \text{ M K}_3\text{Fe}(\text{CN})_6 + 0.05 \text{ M K}_4\text{Fe}(\text{CN})_6$ .
